# Supplementary material for: Differentiation between Fresh and Thawed Cephalopods Using NIR Spectroscopy and Multivariate Data Analysis
Source: PubMed Central journal article supplement (PMC7999131; doi:10.3390/foods10030528), 2021-03-03
Supplement: foods-10-00528-s001.pdf [file foods-10-00528-s001.pdf]

## Supplementary Materials

# Differentiation between Fresh and Thawed Cephalopods Using NIR Spectroscopy and Multivariate Data Analysis

Francesco Pennisi <sup>1, #</sup>, Alessandro Giraudo <sup>2, #</sup>, Nicola Cavallini <sup>2</sup>, Giovanna Esposito <sup>1</sup>, Gabriele Merlo <sup>3</sup>, Francesco Geobaldo <sup>2</sup>, Pier Luigi Acutis <sup>1</sup>, Marzia Pezzolato <sup>1, \*</sup>, Francesco Savorani <sup>2, ♦</sup> and Elena Bozzetta <sup>1, ♦</sup>

<sup>1</sup> Istituto Zooprofilattico Sperimentale del Piemonte, Liguria e Valle d'Aosta, Via Bologna 148, 10154 Turin, ITALY, francesco.pennisi@izsto.it (F.P.); giovanna.esposito@izsto.it (G.E.); pierluigi.acutis@izsto.it (P.L.A.); elena.bozzetta@izsto.it (E.B.);

<sup>2</sup> Department of Applied Science and Technology, Politecnico di Torino, Corso Duca degli Abruzzi 24, 10129 Turin, ITALY, alessandro.giraudo@polito.it (A.G.); nicola.cavallini@polito.it (N.C.); francesco.geobaldo@polito.it (F.G.); francesco.savorani@polito.it (F.S.);

<sup>3</sup> Esselunga S.p.A, Via Giambologna 1, 20096 Limoto di Pioltello (MI), ITALY, gabriele.merlo@esselunga.it

<sup>#</sup> The authors equally contributed to this work

<sup>♦</sup> The authors equally contributed to this work

<sup>\*</sup> Correspondence: marzia.pezzolato@izsto.it; Tel: +39-011-2686-254

## The Table of Contents:

**Figure 1S.** Example of raw NIR spectra of cuttlefish and musky octopus samples acquired using SCiO, MicroNIR, and MPA instruments.

**Figure 2S.** PCA loadings corresponding to the principal components shown in Figure 1.

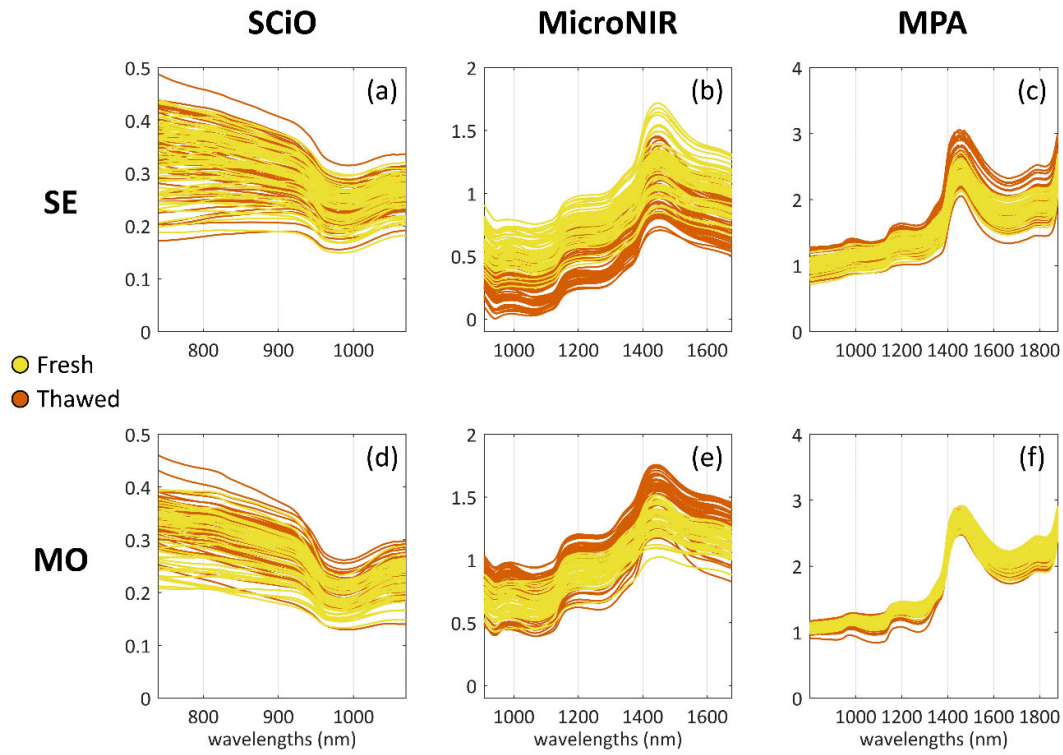

**Figure 1S.** Example of raw NIR spectra of cuttlefish (“SE”; a, b, c) and musky octopus (“MO”; d, e, f) samples acquired using SCiO, MicroNIR, and MPA instruments. Fresh samples are depicted in yellow, while thawed samples are colored in orange.

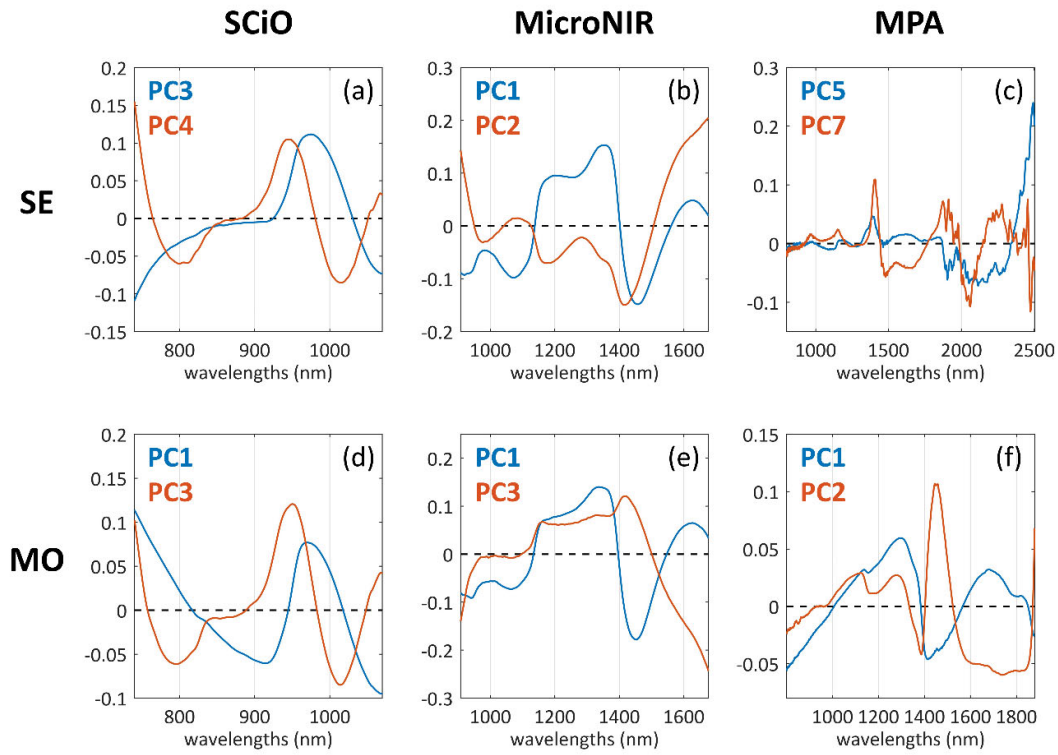

**Figure 2S.** PCA loadings corresponding to the principal components (PC) shown in Figure 1 (PCA score plots). Models corresponding to cuttlefish (“SE”; a, b, c) and musky octopus (“MO”; d, e, f) individual datasets are reported.
